# Supplementary material for: Microwave-Accelerated McKenna Synthesis of Phosphonic Acids: An Investigation
Source: MDPI journal article supplement (doi:10.3390/molecules28083497), 2023-04-15
Supplement: s1 [file s1]

## Supplementary Material

### Microwave-Accelerated McKenna Synthesis of Phosphonic Acids: an Investigation

Dana Mustafa<sup>1,2</sup>, Justin M. Overhulse<sup>1</sup>, Baoris A. Kashemirov<sup>1</sup> and Charles E. McKenna<sup>1\*</sup>

<sup>1</sup> University of Southern California, Department of Chemistry, Los Angeles, CA 90089, USA

<sup>2</sup> Current address: Dentons US LLP, San Diego, CA 92121

\* Correspondence: [mckenna@usc.edu](mailto:mckenna@usc.edu)

## Table of Contents

|                                                                                                                      |    |
|----------------------------------------------------------------------------------------------------------------------|----|
| Figure S1. Representative $^1\text{H}$ NMR spectrum of methylphosphonic acid.....                                    | 2  |
| Figure S2. Representative $^{31}\text{P}$ NMR spectrum of methylphosphonic acid.....                                 | 3  |
| Figure S3. $^{31}\text{P}$ NMR spectrum of ester of (2-methoxy-2-oxoethyl)phosphonic acid. ....                      | 4  |
| Figure S4. $^{31}\text{P}$ NMR spectrum of ester of (2-ethoxy-2-oxoethyl)phosphonic acid. ....                       | 5  |
| Figure S5. $^1\text{H}$ NMR spectrum of (2-methoxy-2-oxoethyl)phosphonic acid. ....                                  | 6  |
| Figure S6. $^{31}\text{P}$ NMR spectrum of (2-methoxy-2-oxoethyl)phosphonic acid. ....                               | 7  |
| Figure S7. $^1\text{H}$ NMR spectrum of (2-ethoxy-2-oxoethyl)phosphonic acid. ....                                   | 8  |
| Figure S8. $^{31}\text{P}$ NMR spectrum of (2-ethoxy-2-oxoethyl)phosphonic acid. ....                                | 9  |
| Figure S9. $^1\text{H}$ NMR spectrum of phosphonoacetic acid.....                                                    | 10 |
| Figure S10. $^{31}\text{P}$ NMR spectrum of phosphonoacetic acid.....                                                | 11 |
| Figure S11. $^{31}\text{P}$ NMR spectrum of (bromodifluoromethyl)phosphonic acid. ....                               | 12 |
| Figure S12. $^1\text{H}$ NMR spectrum of 9-[2-(phosphonomethoxy)ethyl]-2,6-diaminopurine<br>(PMEDAP).....            | 13 |
| Figure S13. $^{31}\text{P}$ NMR spectrum of PMEDAP. ....                                                             | 14 |
| Figure S14. $^1\text{H}$ NMR spectrum of 9-[(2-(S)-(phosphonomethoxy)propyl)-2,6-diaminopurine ((S)-<br>PMPDAP)..... | 15 |
| Figure S15. $^{31}\text{P}$ NMR spectrum of (S)-PMPDAP.....                                                          | 16 |
| Figure S16. $^1\text{H}$ NMR spectrum of 9-(2-phosphonomethoxy)ethyladenine (PMEA).....                              | 17 |
| Figure S17. $^{31}\text{P}$ NMR spectrum of PMEA.....                                                                | 18 |
| Figure S18. Microwave reactor used in the synthetic experiments. ....                                                | 19 |

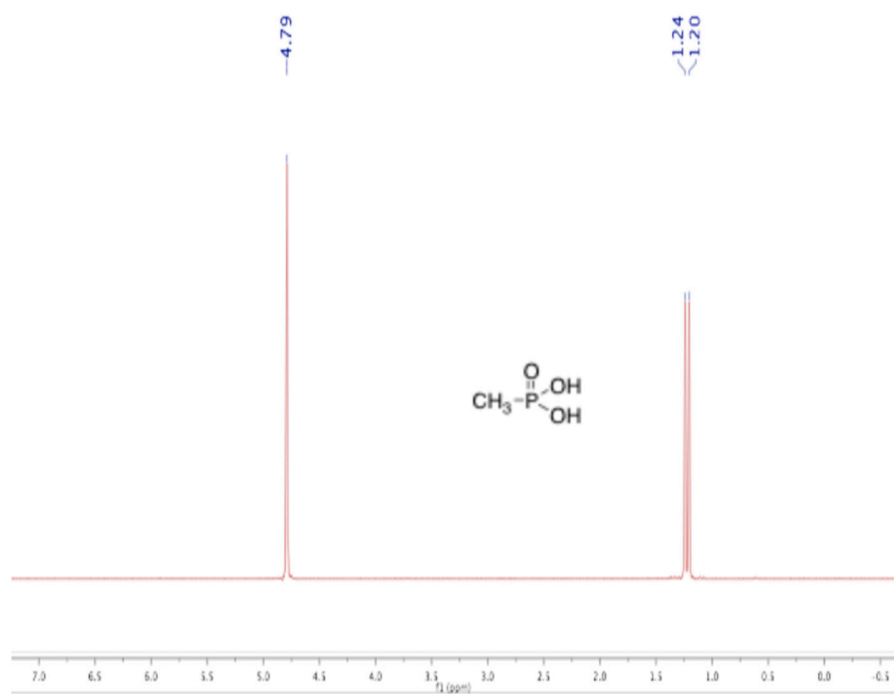

**Figure S1.** Representative  $^1\text{H}$  NMR spectrum of methylphosphonic acid. Product obtained from microwave reactions listed in Table 1. Reaction: Table 1, Entry 1.  $^1\text{H}$  NMR (500 MHz,  $\text{D}_2\text{O}$ )  $\delta$ : 1.22 (d).

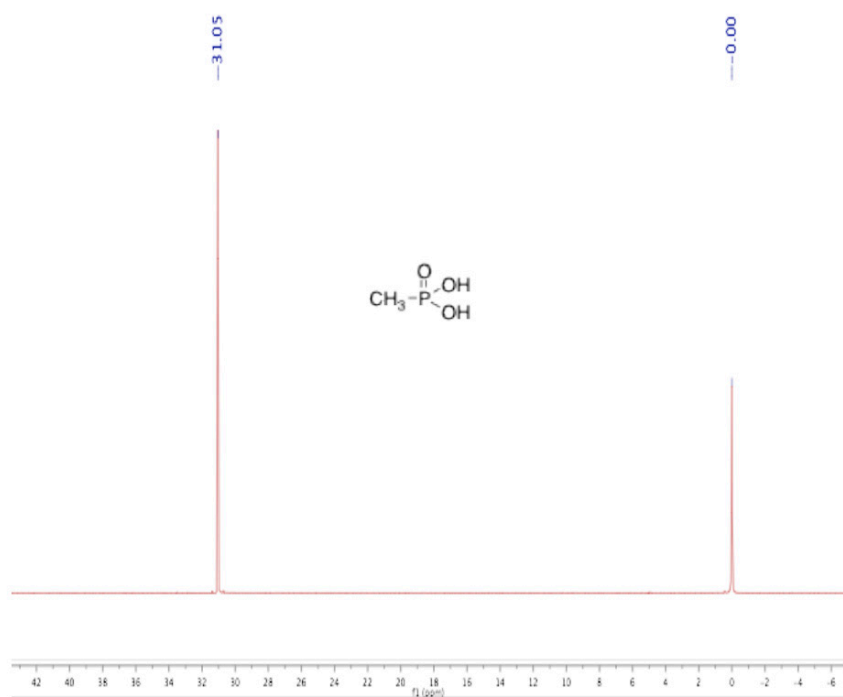

**Figure S2.** Representative  $^{31}\text{P}$  NMR spectrum of methylphosphonic acid. Product obtained from microwave reactions listed in Table 1. Reaction: Table 1, Entry 1.  $^{31}\text{P}$  NMR (202 MHz,  $\text{D}_2\text{O}$ , external  $\text{H}_3\text{PO}_4$  standard (0 ppm))  $\delta$ : 31.05.

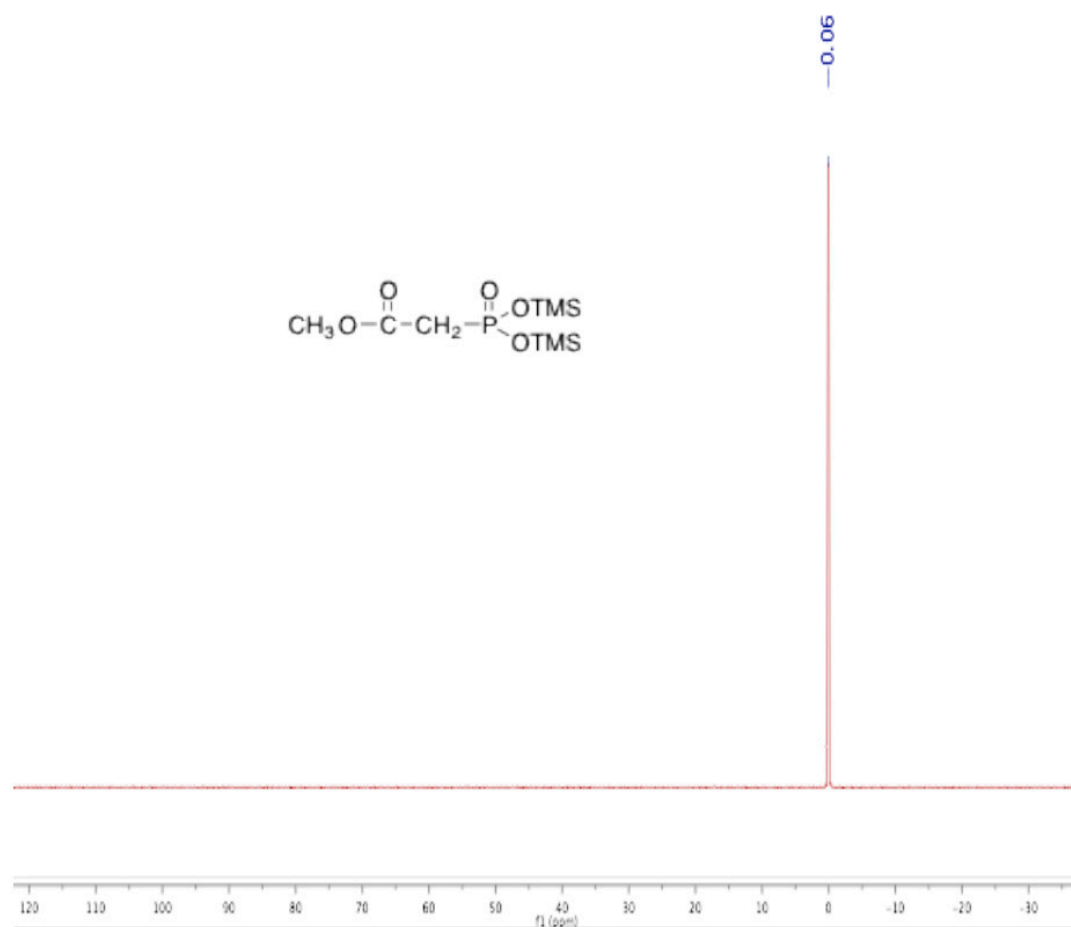

**Figure S3.**  $^{31}\text{P}$  NMR spectrum of ester of (2-methoxy-2-oxoethyl)phosphonic acid. Product of the BTMS microwave reaction mixture containing the silyl ester of (2-methoxy-2-oxoethyl)phosphonic acid. The single peak demonstrates the selectivity of BTMS for phosphonate esters. Reaction: Table 2, Entry 1.  $^{31}\text{P}$  NMR (202 MHz,  $\text{CDCl}_3$ )  $\delta$ : 0.06.

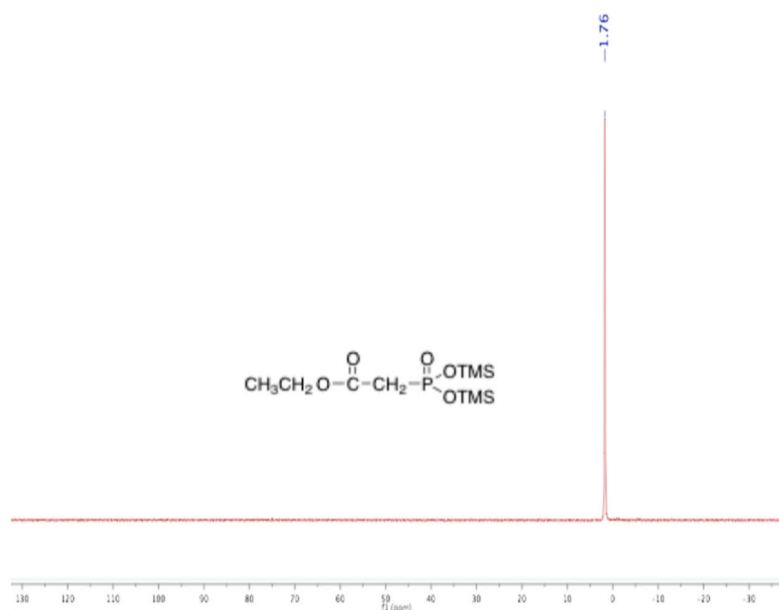

**Figure S4.**  $^{31}\text{P}$  NMR spectrum of ester of (2-ethoxy-2-oxoethyl)phosphonic acid. Product of the BTMS microwave reaction mixture containing the silyl ester of (2-ethoxy-2-oxoethyl)phosphonic acid. The single peak demonstrates the selectivity of BTMS for phosphonate esters. Reaction: Table 2, Entry 2.  $^{31}\text{P}$  NMR (202 MHz,  $\text{CDCl}_3$ )  $\delta$ : 1.76.

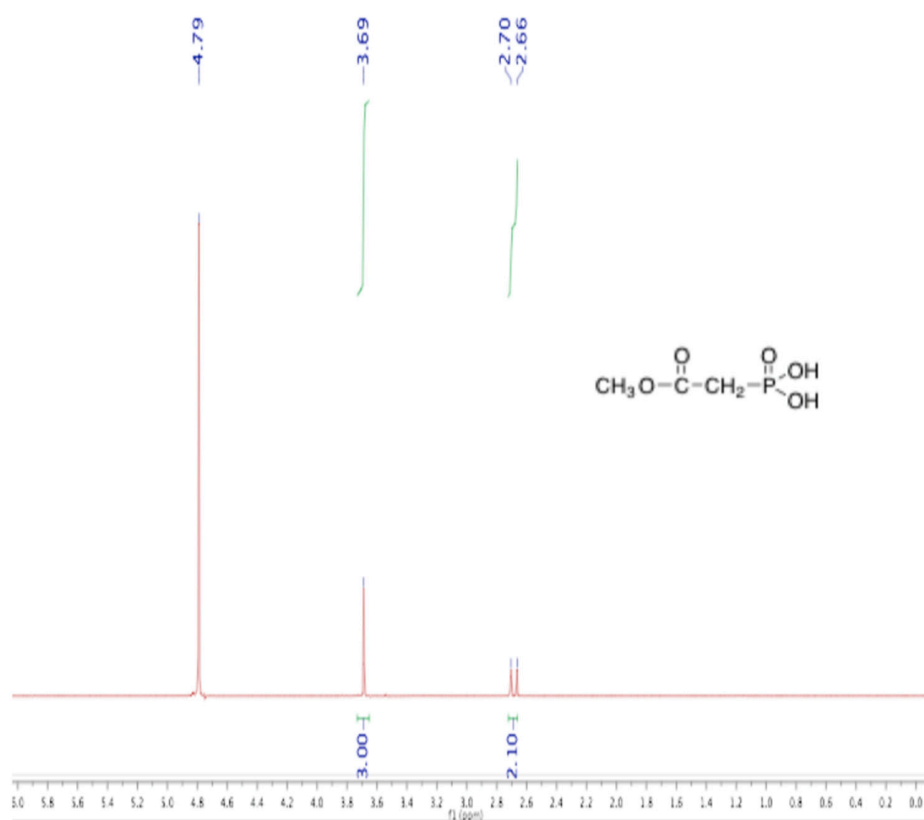

**Figure S5.**  $^1\text{H}$  NMR spectrum of (2-methoxy-2-oxoethyl)phosphonic acid. Product from the BTMS microwave reaction of trimethylphosphonoacetate after desilylation. Reaction: Table 2, Entry 1.  $^1\text{H}$  NMR (500 MHz,  $\text{D}_2\text{O}$ , pH 7.6)  $\delta$ : 2.68 (d, 2H), 3.69 (s, 3H).

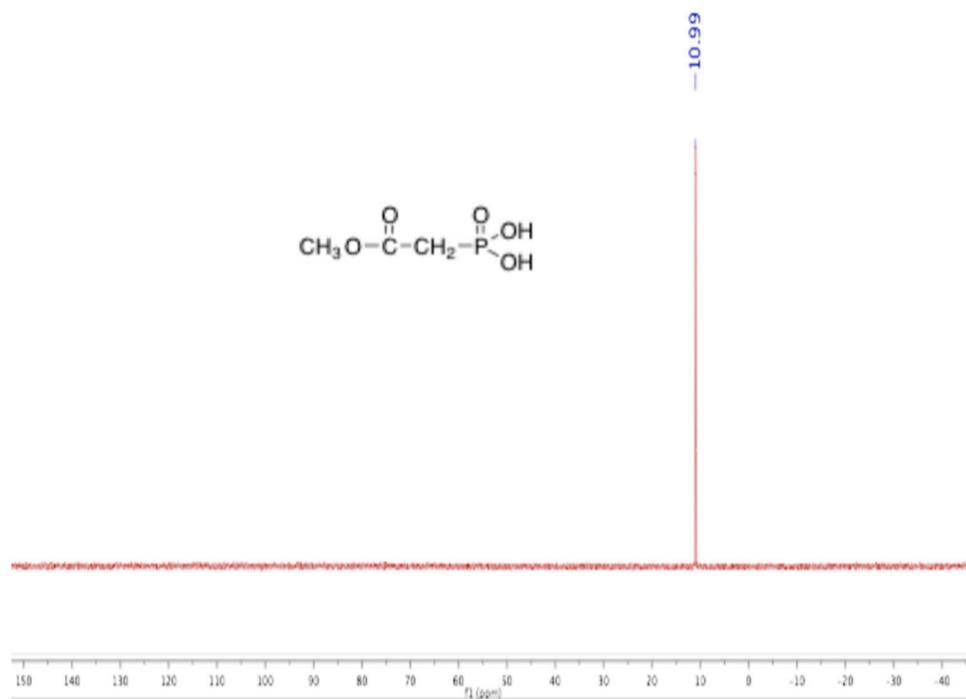

**Figure S6.**  $^{31}\text{P}$  NMR spectrum of (2-methoxy-2-oxoethyl)phosphonic acid. Product of the BTMS microwave reaction of trimethylphosphonoacetate after desilylation. Reaction: Table 2, Entry 1.  $^{31}\text{P}$  NMR (202 MHz,  $\text{D}_2\text{O}$ , pH 7.6)  $\delta$ : 10.99.



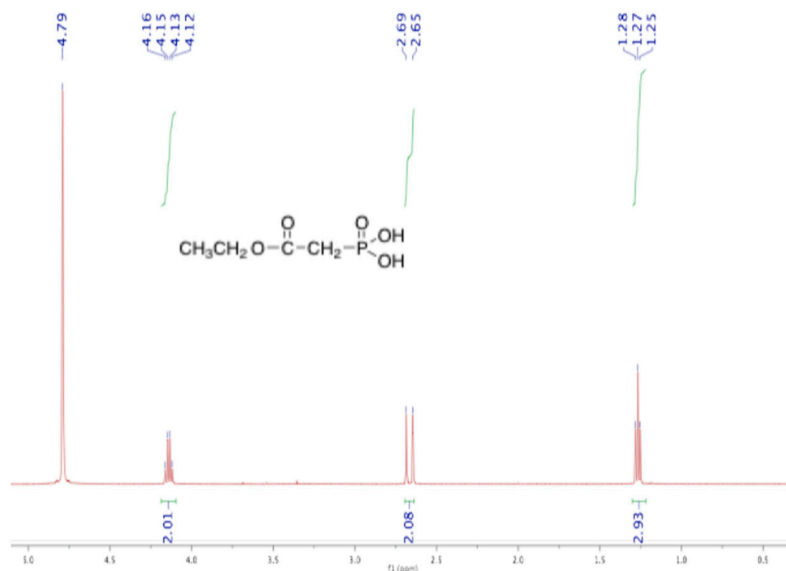

**Figure S7.**  $^1\text{H}$  NMR spectrum of (2-ethoxy-2-oxoethyl)phosphonic acid. Product of the BTMS microwave reaction of triethylphosphonoacetate after desilylation. Reaction: Table 2, Entry 2.  $^1\text{H}$  NMR (500 MHz,  $\text{D}_2\text{O}$ , pH 8.2)  $\delta$ : 1.27 (t, 3H), 2.67 (d, 2H), 4.14 (q, 2H).

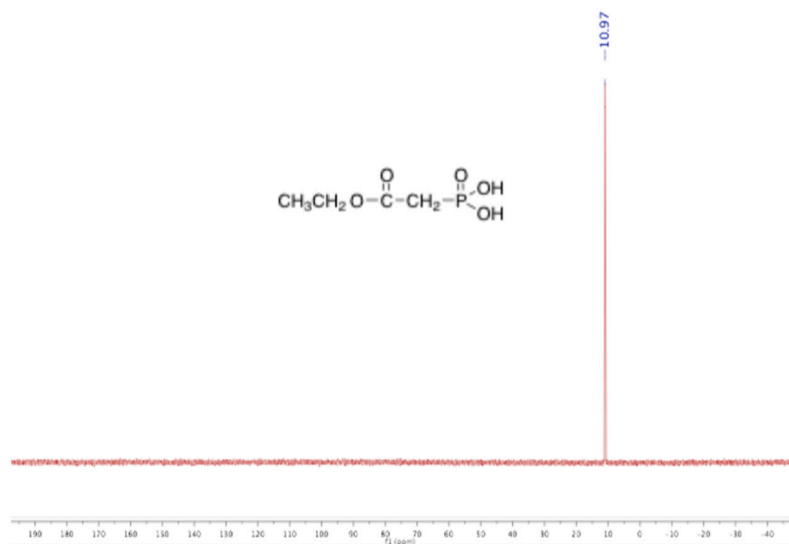

**Figure S8.**  $^{31}\text{P}$  NMR spectrum of (2-ethoxy-2-oxoethyl)phosphonic acid. Product of the BTMS microwave reaction of triethylphosphonoacetate after desilylation. Reaction: Table 2, Entry 2.  $^{31}\text{P}$  NMR (202 MHz,  $\text{D}_2\text{O}$ , pH 8.2)  $\delta$ : 10.97.

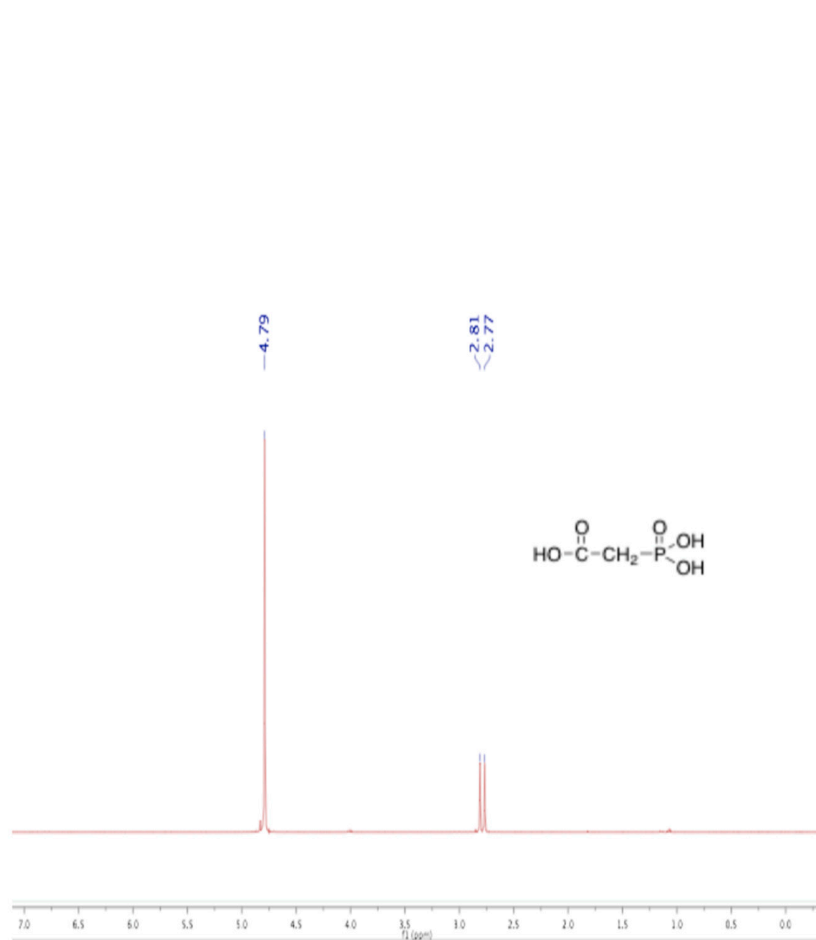

**Figure S9.**  $^1\text{H}$  NMR spectrum of phosphonoacetic acid.  
 Product of the BTMS microwave reaction of 2-(diethoxyphosphoryl)acetic acid after desilylation.  
 Reaction: Table 2, Entry 3.  $^1\text{H}$  NMR (500 MHz,  $\text{D}_2\text{O}$ )  $\delta$ : 2.79 (d).

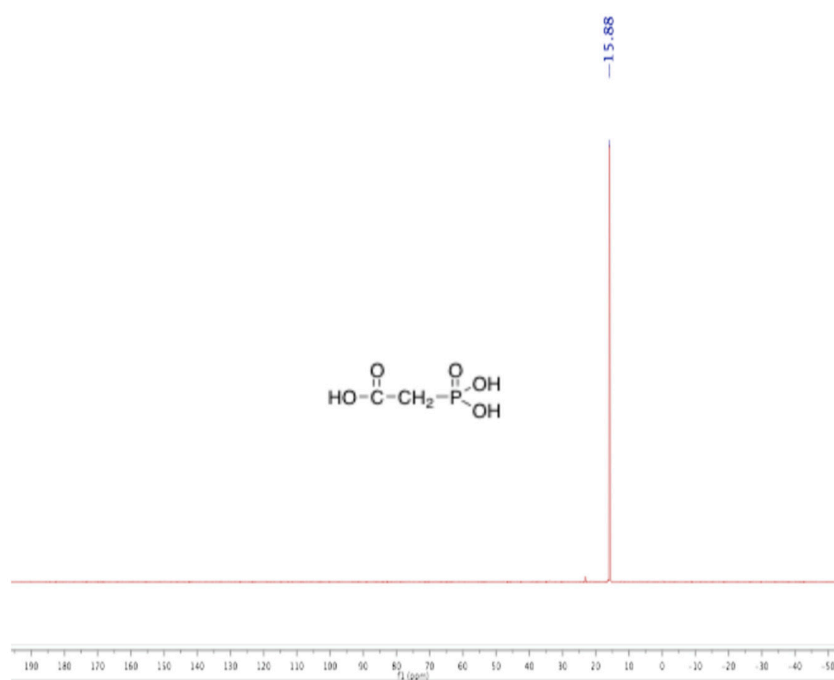

**Figure S10.**  $^{31}\text{P}$  NMR spectrum of phosphonoacetic acid.  
Product of the BTMS microwave reaction of 2-(diethoxyphosphoryl)acetic acid after desilylation.  
Reaction: Table 2, Entry 3.  $^{31}\text{P}$  NMR (202 MHz,  $\text{D}_2\text{O}$ )  $\delta$ : 15.88.

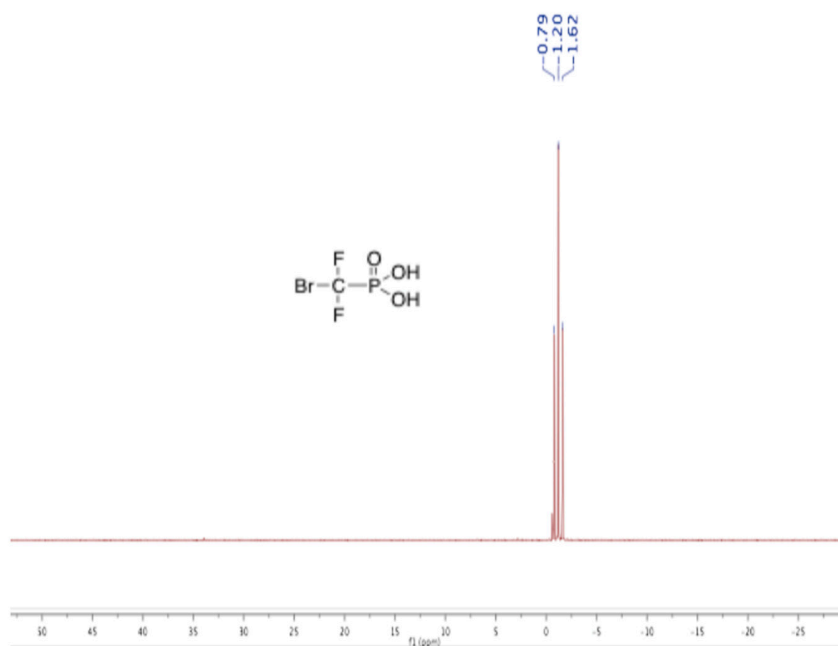

**Figure S11.**  $^{31}\text{P}$  NMR spectrum of (bromodifluoromethyl)phosphonic acid. Product of the BTMS microwave reaction of diethyl (bromodifluoromethyl)phosphonate after desilylation. Reaction: Table 2, Entry 4.  $^{31}\text{P}$  NMR (202 MHz,  $\text{D}_2\text{O}$ )  $\delta$ : -1.20 (t).

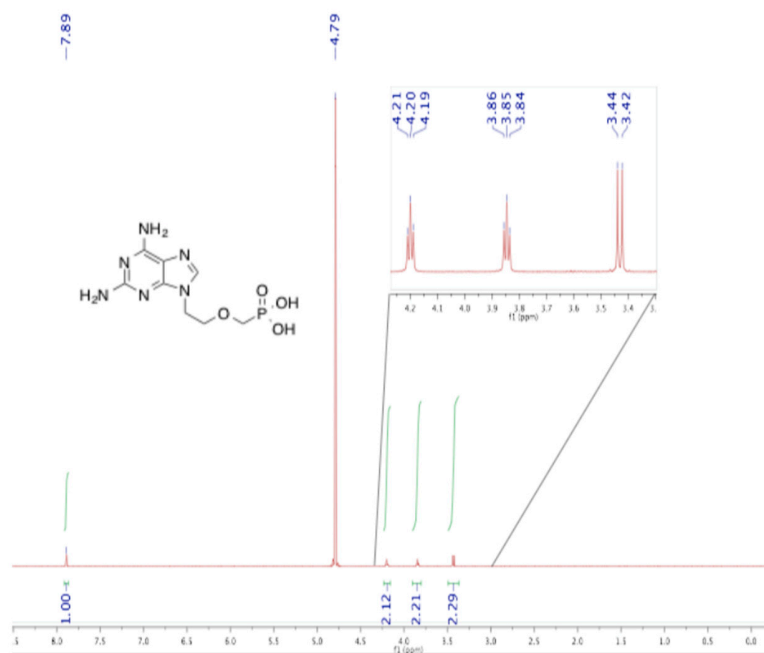

**Figure S12.** <sup>1</sup>H NMR spectrum of 9-[2-(phosphonomethoxy)ethyl]-2,6-diaminopurine (PMEDAP). Product of the BTMS microwave reaction of PMEDAP(OiPr)<sub>2</sub> after desilylation. Reaction: Table 3, Entry 1. <sup>1</sup>H NMR (500 MHz, D<sub>2</sub>O) δ: 3.43 (d, 2H), 3.85 (t, 2H), 4.20 (t, 2H), 7.89 (s, 1H).

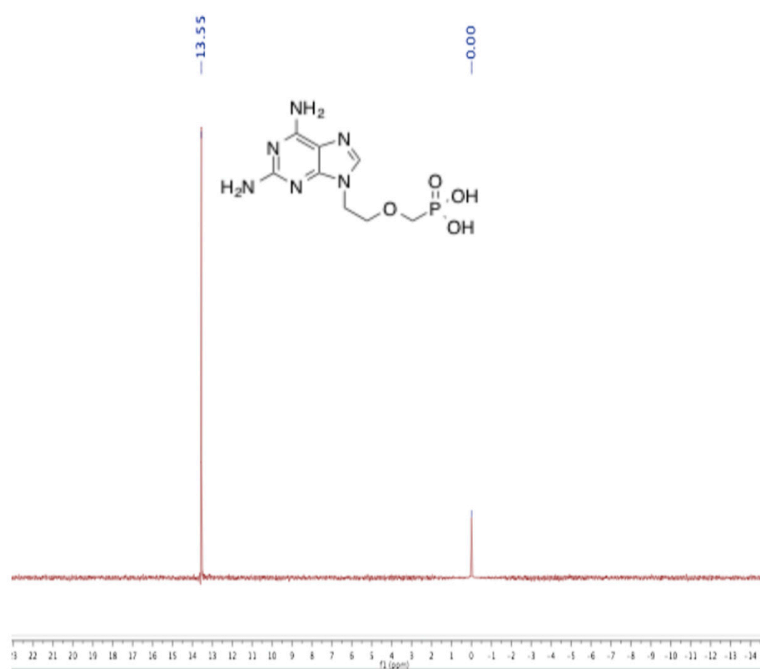

**Figure S13.**  $^{31}\text{P}$  NMR spectrum of PMEDAP.

Product of the BTMS microwave reaction of PMEDAP(OiPr) $_2$  after desilylation. Reaction: Table 3, Entry 1.  $^{31}\text{P}$  NMR (202 MHz, D $_2$ O, external H $_3$ PO $_4$  standard (0 ppm))  $\delta$ : 13.55.

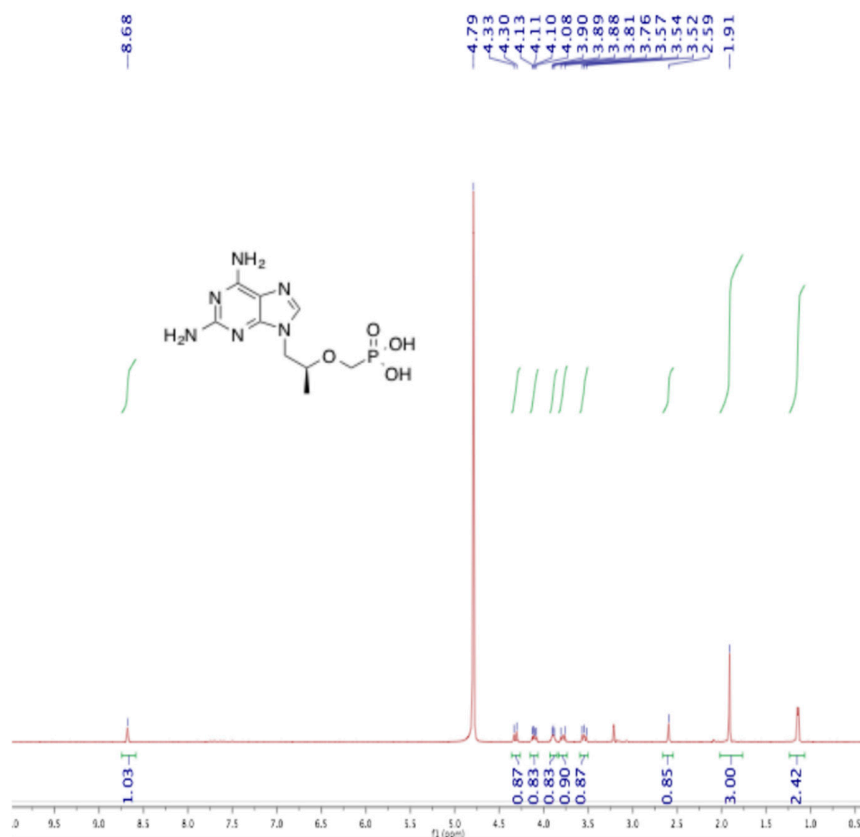

**Figure S14.** <sup>1</sup>H NMR spectrum of 9-[(2-(S)-(phosphonomethoxy)propyl)-2,6-diaminopurine] ((S)-PMPDAP).

Product of the BTMS microwave reaction of (S)-PMPDAP(OEt)<sub>2</sub> after desilylation. Reaction: Table 3, Entry 2. <sup>1</sup>H NMR (500 MHz, D<sub>2</sub>O) δ: 1.91 (s, 3H), 2.59 (s, 1H), 3.54 (t, 1H), 3.78 (m, 1H), 3.89 (m, 1H), 4.10 (m, 1H), 4.31 (d, 1H), 8.68 (s, 1H).



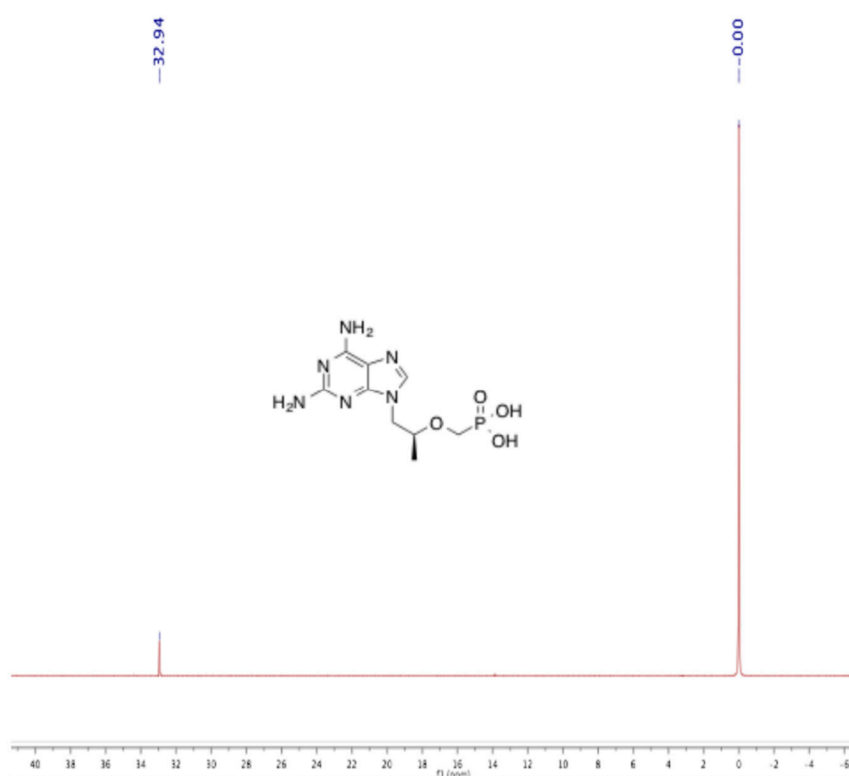

**Figure S15.**  $^{31}\text{P}$  NMR spectrum of (S)-PMPDAP.

Product of the BTMS microwave reaction of (S)-PMPDAP(OEt) $_2$  after desilylation. Reaction: Table 3, Entry 2.  $^{31}\text{P}$  NMR (202 MHz, D $_2$ O, external H $_3$ PO $_4$  standard (0 ppm))  $\delta$ : 32.94.

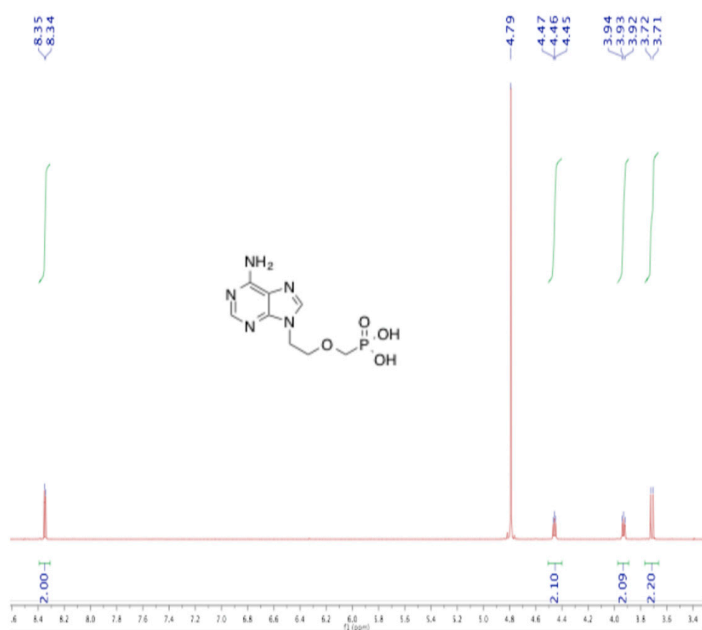

**Figure S16.** <sup>1</sup>H NMR spectrum of 9-(2-phosphonomethoxy)ethyladenine (PMEA). Product of the BTMS microwave reaction of PMEAOiPr<sub>2</sub> after desilylation. Reaction: Table 3, Entry 3. <sup>1</sup>H NMR of (500 MHz, D<sub>2</sub>O) δ: 3.71 (d, 2H), 3.93 (t, 2H), 4.46 (t, 2H), 8.34 (d, 2H).

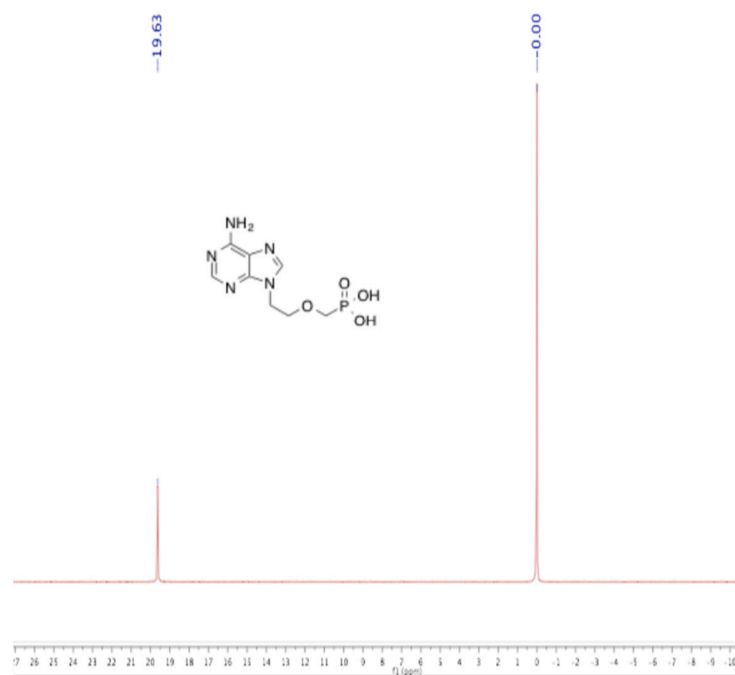

**Figure S17.**  $^{31}\text{P}$  NMR spectrum of PMEA.

Product of the BTMS microwave reaction of  $\text{PMEA}(\text{OiPr})_2$  after desilylation. Reaction: Table 3, Entry 3.  $^{31}\text{P}$  NMR (202 MHz,  $\text{D}_2\text{O}$ , external  $\text{H}_3\text{PO}_4$  standard (0 ppm))  $\delta$ : 19.63.

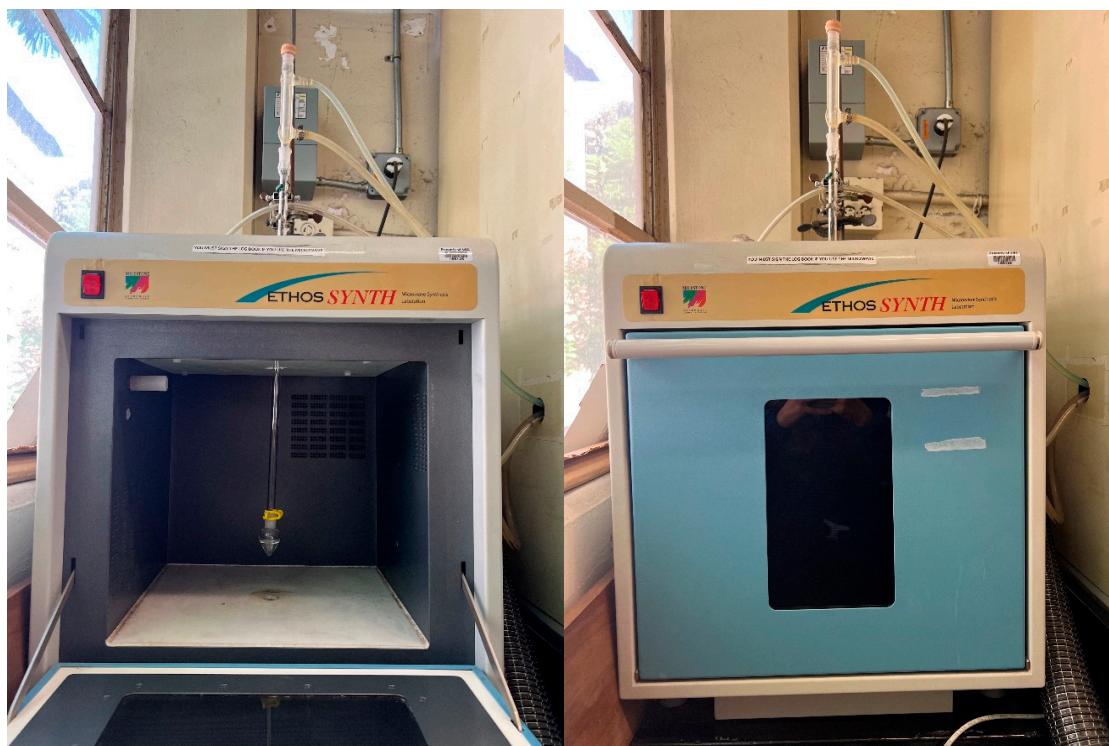

**Figure S18.** Microwave reactor used in the synthetic experiments.  
The left panel shows the reaction flask attached to the built-in condenser of the Ethos SYNTH reactor. The right panel shows the setup with the door shut, during reaction.
